# Supplementary material for: Inter-population variability of DEFA3 gene absence: correlation with haplotype structure and population variability
Source: PubMed Central journal article supplement (PMC1779775; doi:10.1186/1471-2164-8-14), 2007-01-10
Supplement: 1471-2164-8-14-S1.pdf [file 1471-2164-8-14-S1.pdf]

**SUPL TABLE 1. Association results under all inheritance modes tested for the three population groups**  
 <NA>; not available

**CEPH**

|    | <b>SNP</b> | <b>codominant</b> | <b>dominant</b> | <b>recessive</b> | <b>overdominant</b> | <b>additive</b> |
|----|------------|-------------------|-----------------|------------------|---------------------|-----------------|
| 1  | rs13257112 | Monomorphic       |                 |                  |                     |                 |
| 2  | rs11989361 | 0.5668            | <NA>            | <NA>             | <NA>                | 0.5668          |
| 3  | rs6996047  | 0.9567            | 0.9682          | 0.7791           | 0.8829              | 0.8776          |
| 4  | rs11996293 | Monomorphic       |                 |                  |                     |                 |
| 5  | rs11996346 | 0.5653            | 0.5784          | 0.3037           | 0.8646              | 0.4404          |
| 6  | rs4543566  | Monomorphic       |                 |                  |                     |                 |
| 7  | rs13267882 | 0.5668            | <NA>            | <NA>             | <NA>                | 0.5668          |
| 8  | rs13278672 | Monomorphic       |                 |                  |                     |                 |
| 9  | rs3739385  | Monomorphic       |                 |                  |                     |                 |
| 10 | rs17078435 | Monomorphic       |                 |                  |                     |                 |
| 11 | rs2978945  | Monomorphic       |                 |                  |                     |                 |
| 12 | rs17078436 | Monomorphic       |                 |                  |                     |                 |
| 13 | rs10087798 | Monomorphic       |                 |                  |                     |                 |
| 14 | rs10106288 | Monomorphic       |                 |                  |                     |                 |
| 15 | rs2978916  | 0.0045            | 0.001           | 0.1508           | 0.0059              | 0.001           |
| 16 | rs2615766  | Monomorphic       |                 |                  |                     |                 |
| 17 | rs2927342  | Monomorphic       |                 |                  |                     |                 |
| 18 | rs12682063 | 0.407             | <NA>            | <NA>             | <NA>                | 0.407           |
| 19 | rs12682076 | Monomorphic       |                 |                  |                     |                 |
| 20 | rs12675298 | 0.4115            | <NA>            | <NA>             | <NA>                | 0.4115          |
| 21 | rs2978914  | Monomorphic       |                 |                  |                     |                 |
| 22 | rs10095450 | 0.4281            | <NA>            | <NA>             | <NA>                | 0.4281          |
| 23 | rs2927351  | 3,00E-04          | <NA>            | <NA>             | <NA>                | 3,00E-04        |
| 24 | rs2977814  | 0.0136            | 0.0034          | 0.4158           | 0.0059              | 0.0034          |
| 25 | rs5028372  | 0.0037            | 0.3347          | 8,00E-04         | 0.1563              | 0.0085          |
| 26 | rs11137085 | 0.0991            | 0.0616          | 0.1745           | 0.2292              | 0.0381          |
| 27 | rs4841815  | 0.9053            | <NA>            | <NA>             | <NA>                | 0.9053          |
| 28 | rs4284061  | 0.2779            | 0.2981          | 0.1468           | 0.7035              | 0.1811          |
| 29 | rs11781199 | Monomorphic       |                 |                  |                     |                 |
| 30 | rs11781205 | Monomorphic       |                 |                  |                     |                 |
| 31 | rs17466573 | 2,00E-04          | 0.035           | 0,035            | 0.6524              | 6,00E-04        |
| 32 | rs7825750  | 0.2907            | 0.2223          | 0.1918           | 0.4973              | 0.154           |
| 33 | rs6983783  | Monomorphic       |                 |                  |                     |                 |
| 34 | rs4300027  | 0.1365            | 0.0468          | 0.5226           | 0.1244              | 0.0794          |
| 35 | rs4512398  | 0.1365            | 0.0468          | 0.5226           | 0.1244              | 0.0794          |
| 36 | rs10109569 | Monomorphic       |                 |                  |                     |                 |
| 37 | rs7826487  | 0.3142            | <NA>            | <NA>             | <NA>                | 0.3142          |
| 38 | rs17078510 | 0.4435            | <NA>            | <NA>             | <NA>                | 0.4435          |
| 39 | rs7841223  | 0.4435            | <NA>            | <NA>             | <NA>                | 0.4435          |
| 40 | rs7012647  | Monomorphic       |                 |                  |                     |                 |
| 41 | rs4288398  | 0.1498            | 0.126           | 0.1188           | 0.4405              | 0.0724          |
| 42 | rs4313182  | 0.1188            | <NA>            | <NA>             | <NA>                | 0.1188          |
| 43 | rs883182   | 0.4073            | 0.971           | 0.1918           | 0.5625              | 0.6859          |
| 44 | rs11783110 | Monomorphic       |                 |                  |                     |                 |
| 45 | rs4314670  | Monomorphic       |                 |                  |                     |                 |
| 46 | rs4332159  | 0.1188            | <NA>            | <NA>             | <NA>                | 0.1188          |
| 47 | rs4448289  | 0.4158            | <NA>            | <NA>             | <NA>                | 0.4158          |
| 48 | rs4469481  | 0.2892            | 0.1152          | 0.5632           | 0.1468              | 0.1152          |
| 49 | rs9774483  | 0.1188            | <NA>            | <NA>             | <NA>                | 0.1188          |
| 50 | rs17078531 | Monomorphic       |                 |                  |                     |                 |
| 51 | rs17382179 | 0.0039            | 0.0128          | 0.0047           | 0.2096              | 0.0019          |
| 52 | rs4840665  | Monomorphic       |                 |                  |                     |                 |
| 53 | rs6984215  | 0.1276            | 0.1358          | 0.0937           | 0.5625              | 0.0665          |
| 54 | rs6605579  | 0.1861            | 0.2501          | 0.0873           | 0.8915              | 0.0904          |
| 55 | rs7820625  | 0.212             | 0.4032          | 0.0905           | 0.9312              | 0.187           |
| 56 | rs7816622  | 0.1963            | 0.3368          | 0.0905           | 0.9803              | 0.1543          |
| 57 | rs7821152  | Monomorphic       |                 |                  |                     |                 |
| 58 | rs4403430  | 0.3482            | 0.7168          | 0.1468           | 0.7587              | 0.4184          |
| 59 | rs11137086 | 0.1188            | <NA>            | <NA>             | <NA>                | 0.1188          |

|     |            |                     |        |        |        |          |
|-----|------------|---------------------|--------|--------|--------|----------|
| 60  | rs6982814  | 0.1188              | <NA>   | <NA>   | <NA>   | 0.1188   |
| 61  | rs11776120 | 0.4032              | 0.6762 | 0.2409 | 0.3875 | 0.9841   |
| 62  | rs6993492  | 0.1188              | <NA>   | <NA>   | <NA>   | 0.1188   |
| 63  | rs7824527  | 0.1199              | <NA>   | <NA>   | <NA>   | 0.1199   |
| 64  | rs13275347 | 0.5668              | <NA>   | <NA>   | <NA>   | 0.5668   |
| 65  | rs7825124  | 0.1188              | <NA>   | <NA>   | <NA>   | 0.1188   |
| 66  | rs4841816  | Monomorphic         |        |        |        |          |
| 67  | rs4433170  | 0.3939              | 0.6381 | 0.2453 | 0.3628 | 0.9766   |
| 68  | rs4300028  | 0.0463              | 0.0481 | 0.0558 | 0.4525 | 0.0192   |
| 69  | rs4500099  | 8,00E-04            | 0.0018 | 0.0047 | 0.0609 | 3,00E-04 |
| 70  | rs4576447  | 0.0132              | <NA>   | <NA>   | <NA>   | 0.0132   |
| 71  | rs6994783  | Monomorphic         |        |        |        |          |
| 72  | rs7015200  | 0.0184              | 0.0165 | 0.035  | 0.2103 | 0.0048   |
| 73  | rs17466706 | 8,00E-04            | 0.0018 | 0.0047 | 0.0609 | 3,00E-04 |
| 74  | rs11775034 | 0.4202              | 0.8846 | 0.1918 | 0.6846 | 0.5863   |
| 75  | rs7004995  | 0.0166              | 0.0136 | 0.0364 | 0.1833 | 0.0042   |
| 76  | rs6982904  | Geno typing 78.3\\% |        |        |        |          |
| 77  | rs11985030 | 0.0389              | <NA>   | <NA>   | <NA>   | 0.0389   |
| 78  | rs4840666  | 0.0185              | 0.0154 | 0.0378 | 0.1973 | 0.0048   |
| 79  | rs17078556 | 0.0206              | 0.0174 | 0.0393 | 0.2126 | 0.0054   |
| 80  | rs4621824  | 0.0184              | 0.0165 | 0.035  | 0.2103 | 0.0048   |
| 81  | rs4345578  | Monomorphic         |        |        |        |          |
| 82  | rs4342629  | 0.104               | 0.0341 | 0.4336 | 0.0866 | 0.0492   |
| 83  | rs4342630  | Monomorphic         |        |        |        |          |
| 84  | rs4342631  | Monomorphic         |        |        |        |          |
| 85  | rs4549798  | 0.0223              | 0.0223 | 0.035  | 0.2557 | 0.0061   |
| 86  | rs4342632  | Monomorphic         |        |        |        |          |
| 87  | rs13256091 | 0.2574              | 0.1833 | 0.2409 | 0.3875 | 0.1274   |
| 88  | rs4601339  | Monomorphic         |        |        |        |          |
| 89  | rs7461488  | Monomorphic         |        |        |        |          |
| 90  | rs4642671  | Monomorphic         |        |        |        |          |
| 91  | rs4840667  | 0.1188              | <NA>   | <NA>   | <NA>   | 0.1188   |
| 92  | rs4546682  | 0.1152              | <NA>   | <NA>   | <NA>   | 0.1152   |
| 93  | rs6981771  | 0.1078              | 0.2764 | 0.0437 | 0.8439 | 0.0931   |
| 94  | rs6996918  | 0.0971              | 0.2222 | 0.0437 | 0.9312 | 0.0736   |
| 95  | rs7009276  | 0.0915              | 0.2612 | 0.036  | 0.7999 | 0.081    |
| 96  | rs4841818  | 0.1833              | <NA>   | <NA>   | <NA>   | 0.1833   |
| 97  | rs4358823  | 0.1468              | <NA>   | <NA>   | <NA>   | 0.1468   |
| 98  | rs12716641 | 0.1238              | 0.4032 | 0.0437 | 0.6762 | 0.1408   |
| 99  | rs12716642 | 0.1491              | 0.4032 | 0.0558 | 0.7587 | 0.1548   |
| 100 | rs13274544 | 0.18                | 0.5271 | 0.0654 | 0.6738 | 0.2209   |
| 101 | rs13439266 | Monomorphic         |        |        |        |          |
| 102 | rs12716644 | Monomorphic         |        |        |        |          |
| 103 | rs11989117 | 0.4115              | <NA>   | <NA>   | <NA>   | 0.4115   |
| 104 | rs7836636  | 0.3769              | 0.1704 | 0.4435 | 0.4405 | 0.1765   |
| 105 | rs10086568 | 0.363               | 0.2981 | 0.2409 | 0.5469 | 0.2132   |
| 106 | rs12674716 | 0.8943              | 0.6931 | 0.7089 | 0.9574 | 0.6366   |
| 107 | rs13252474 | 0.4653              | 0.2656 | 0.3811 | 0.7157 | 0.2165   |
| 108 | rs12716645 | 0.3809              | 0.1702 | 0.4738 | 0.4153 | 0.1828   |
| 109 | rs10108420 | 0.9034              | 0.7062 | 0.7362 | 0.9449 | 0.6522   |
| 110 | rs12716647 | 0.1792              | 0.3295 | 0.07   | 0.9348 | 0.1518   |
| 111 | rs13261710 | 0.6097              | 0.4032 | 0.4281 | 0.8439 | 0.3216   |
| 112 | rs4304345  | 0.0905              | <NA>   | <NA>   | <NA>   | 0.0905   |
| 113 | rs7017864  | Monomorphic         |        |        |        |          |
| 114 | rs7017866  | 0.6578              | 0.4254 | 0.4903 | 0.8022 | 0.3603   |
| 115 | rs6992098  | 0.494               | 0.3402 | 0.3173 | 0.9099 | 0.24     |
| 116 | rs13279261 | 0.6198              | 0.4491 | 0.3969 | 0.9388 | 0.3376   |
| 117 | rs2979406  | Monomorphic         |        |        |        |          |
| 118 | rs2979405  | Monomorphic         |        |        |        |          |
| 119 | rs6988346  | 0.4472              | 0.2103 | 0.8281 | 0.2741 | 0.2939   |
| 120 | rs4260915  | 0.3037              | 0.2303 | 0.2323 | 0.4756 | 0.1606   |
| 121 | rs4260916  | 0.4454              | 0.4415 | 0.2475 | 0.7511 | 0.3129   |
| 122 | rs4379464  | 0.4448              | 0.4405 | 0.2453 | 0.736  | 0.3154   |
| 123 | rs12682030 | 0.0558              | <NA>   | <NA>   | <NA>   | 0.0558   |

|     |            |             |        |          |        |        |
|-----|------------|-------------|--------|----------|--------|--------|
| 124 | rs13269815 | 0.4565      | 0.2259 | 0.939    | 0.2501 | 0.3341 |
| 125 | rs6998006  | 0.6097      | 0.4032 | 0.4281   | 0.8439 | 0.3216 |
| 126 | rs6998687  | 0.5625      | 0.3824 | 0.3744   | 0.8846 | 0.2875 |
| 127 | rs6991235  | 0.4357      | 0.2074 | 0.4835   | 0.5101 | 0.2137 |
| 128 | rs6999181  | 0.0937      | <NA>   | <NA>     | <NA>   | 0.0937 |
| 129 | rs2979404  | Monomorphic |        |          |        |        |
| 130 | rs11773934 | Monomorphic |        |          |        |        |
| 131 | rs11137087 | 0.1401      | 0.2295 | 0.0583   | 0.9092 | 0.1027 |
| 132 | rs10503360 | 0.5663      | 0.4032 | 0.3598   | 0.9312 | 0.2943 |
| 133 | rs4446760  | Monomorphic |        |          |        |        |
| 134 | rs9644778  | 0.2759      | 0.1469 | 0.3384   | 0.2531 | 0.1204 |
| 135 | rs10095331 | 0.081       | 0.0639 | 0.0842   | 0.4244 | 0.0253 |
| 136 | rs10098290 | Monomorphic |        |          |        |        |
| 137 | rs4395911  | 0.0937      | <NA>   | <NA>     | <NA>   | 0.0937 |
| 138 | rs4610776  | 0.1177      | 0.0639 | 0.1506   | 0.3628 | 0.0393 |
| 139 | rs6988319  | 0.138       | 0.0743 | 0.7791   | 0.049  | 0.1856 |
| 140 | rs4841831  | 0.1419      | 0.4076 | 0.0483   | 0.3518 | 0.0847 |
| 141 | rs10093453 | 0.4139      | <NA>   | <NA>     | <NA>   | 0.4139 |
| 142 | rs11994229 | Monomorphic |        |          |        |        |
| 143 | rs17078614 | 0.1918      | <NA>   | <NA>     | <NA>   | 0.1918 |
| 144 | rs10100920 | Monomorphic |        |          |        |        |
| 145 | rs7834209  | 0.007       | 0.1523 | 0.0018   | 0.3796 | 0.0057 |
| 146 | rs12547547 | Monomorphic |        |          |        |        |
| 147 | rs4240691  | 0.0014      | 0.0806 | 4,00E-04 | 0.8846 | 0.0025 |
| 148 | rs4448295  | 0.7526      | <NA>   | <NA>     | <NA>   | 0.7526 |
| 149 | rs17078622 | Monomorphic |        |          |        |        |
| 150 | rs17078623 | 0.2317      | <NA>   | <NA>     | <NA>   | 0.2317 |
| 151 | rs13280193 | Monomorphic |        |          |        |        |

#### YORUBA

|    | SNP        | codominant  | dominant | recessive | overdominant | additive |
|----|------------|-------------|----------|-----------|--------------|----------|
| 1  | rs2702908  | 0.3559      | <NA>     | <NA>      | <NA>         | 0.3559   |
| 2  | rs13257112 | 0.181       | <NA>     | <NA>      | <NA>         | 0.181    |
| 3  | rs17381964 | Monomorphic |          |           |              |          |
| 4  | rs11989361 | 0.349       | 0.4462   | 0.1828    | 0.6511       | 0.3175   |
| 5  | rs2978950  | 0.6106      | 0.355    | 0.8771    | 0.3758       | 0.5989   |
| 6  | rs6996047  | 0.685       | <NA>     | <NA>      | <NA>         | 0.685    |
| 7  | rs11996346 | 0.2616      | 0.2649   | 0.1747    | 0.4373       | 0.1788   |
| 8  | rs4543566  | Monomorphic |          |           |              |          |
| 9  | rs13267882 | Monomorphic |          |           |              |          |
| 10 | rs13278672 | Monomorphic |          |           |              |          |
| 11 | rs2978947  | 0.5435      | 0.6045   | 0.2965    | 0.7747       | 0.4865   |
| 12 | rs3739385  | Monomorphic |          |           |              |          |
| 13 | rs2702875  | 0.0852      | 0.6798   | 0.0267    | 0.357        | 0.1698   |
| 14 | rs17078435 | 0.7266      | 0.5378   | 0.7281    | 0.4317       | 0.7178   |
| 15 | rs2951842  | 0.7243      | 0.943    | 0.4536    | 0.6563       | 0.8117   |
| 16 | rs2978945  | Monomorphic |          |           |              |          |
| 17 | rs2978944  | 0.2834      | 0.4093   | 0.1331    | 0.7191       | 0.2584   |
| 18 | rs2978939  | 0.0379      | 0.5472   | 0.0343    | 0.0855       | 0.7699   |
| 19 | rs2978937  | 0.5285      | 0.5424   | 0.2986    | 0.7103       | 0.4338   |
| 20 | rs17078436 | 0.1247      | 0.5438   | 0.1113    | 0.0529       | 0.5715   |
| 21 | rs2738135  | 0.3171      | <NA>     | <NA>      | <NA>         | 0.3171   |
| 22 | rs2977819  | 0.4223      | <NA>     | <NA>      | <NA>         | 0.4223   |
| 23 | rs2738132  | 0.4935      | <NA>     | <NA>      | <NA>         | 0.4935   |
| 24 | rs10087798 | 0.6511      | <NA>     | <NA>      | <NA>         | 0.6511   |
| 25 | rs10106288 | 0.6511      | <NA>     | <NA>      | <NA>         | 0.6511   |
| 26 | rs2978916  | 0.2916      | <NA>     | <NA>      | <NA>         | 0.2916   |
| 27 | rs2615766  | 0.1862      | 0.0984   | 0.2986    | 0.1522       | 0.0787   |
| 28 | rs2927342  | Monomorphic |          |           |              |          |
| 29 | rs12682063 | 0.8034      | <NA>     | <NA>      | <NA>         | 0.8034   |
| 30 | rs12682076 | Monomorphic |          |           |              |          |
| 31 | rs12675298 | 0.9459      | <NA>     | <NA>      | <NA>         | 0.9459   |

|    |            |                     |        |        |        |        |
|----|------------|---------------------|--------|--------|--------|--------|
| 32 | rs2978915  | 0.0504              | 0.8247 | 0.0168 | 0.3559 | 0.3051 |
| 33 | rs2738113  | 0.224               | 1,224  | 0.0966 | 0.3147 | 0.4456 |
| 34 | rs2738110  | 0.2915              | 0.7926 | 0.1194 | 0.4866 | 0.3623 |
| 35 | rs2978914  | Monomorphic         |        |        |        |        |
| 36 | rs10095450 | 0.3551              | <NA>   | <NA>   | <NA>   | 0.3551 |
| 37 | rs11137081 | 0.853               | <NA>   | <NA>   | <NA>   | 0.853  |
| 38 | rs5028372  | Geno typing 78.3\\% |        |        |        |        |
| 39 | rs11137085 | 0.2544              | <NA>   | <NA>   | <NA>   | 0.2544 |
| 40 | rs4841815  | 0.8946              | 0.6511 | 0.8092 | 0.7116 | 0.6371 |
| 41 | rs4284061  | 0.5556              | 0.8909 | 0.2965 | 0.7116 | 0.9325 |
| 42 | rs11781199 | Monomorphic         |        |        |        |        |
| 43 | rs11781205 | 0.187               | <NA>   | <NA>   | <NA>   | 0.187  |
| 44 | rs17466573 | Monomorphic         |        |        |        |        |
| 45 | rs7825750  | 0.734               | 0.9298 | 0.4714 | 0.6511 | 0.8323 |
| 46 | rs6983783  | 0.5322              | 0.3143 | 0.4197 | 0.5775 | 0.2616 |
| 47 | rs4300027  | 0.9179              | <NA>   | <NA>   | <NA>   | 0.9179 |
| 48 | rs4512398  | 0.2545              | 0.2523 | 0.1828 | 0.4008 | 0.1742 |
| 49 | rs10109569 | Monomorphic         |        |        |        |        |
| 50 | rs7826487  | 0.8261              | 0.6593 | 0.7964 | 0.5378 | 0.8497 |
| 51 | rs17078510 | 0.4714              | <NA>   | <NA>   | <NA>   | 0.4714 |
| 52 | rs7841223  | 0.7324              | 0.4505 | 0.6645 | 0.6309 | 0.4368 |
| 53 | rs7012647  | Monomorphic         |        |        |        |        |
| 54 | rs4288398  | 0.4052              | <NA>   | <NA>   | <NA>   | 0.4052 |
| 55 | rs4313182  | 0.1848              | <NA>   | <NA>   | <NA>   | 0.1848 |
| 56 | rs883182   | 0.4858              | 0.4566 | 0.2965 | 0.6045 | 0.3648 |
| 57 | rs11783110 | Monomorphic         |        |        |        |        |
| 58 | rs4314670  | Monomorphic         |        |        |        |        |
| 59 | rs4332159  | 0.2916              | <NA>   | <NA>   | <NA>   | 0.2916 |
| 60 | rs4448289  | Monomorphic         |        |        |        |        |
| 61 | rs4469481  | 0.9693              | <NA>   | <NA>   | <NA>   | 0.9693 |
| 62 | rs9774483  | 0.2916              | <NA>   | <NA>   | <NA>   | 0.2916 |
| 63 | rs17078531 | 0.809               | 0.5342 | 0.7392 | 0.6146 | 0.5151 |
| 64 | rs17382179 | 0.3121              | <NA>   | <NA>   | <NA>   | 0.3121 |
| 65 | rs4840665  | Monomorphic         |        |        |        |        |
| 66 | rs6984215  | 0.659               | <NA>   | <NA>   | <NA>   | 0.659  |
| 67 | rs6605579  | 0.5173              | 0.357  | 0.3706 | 0.5934 | 0.2691 |
| 68 | rs7820625  | 0.7249              | 0.7344 | 0.4273 | 0.9122 | 0.5384 |
| 69 | rs7816622  | 0.5605              | 0.7244 | 0.4142 | 0.3402 | 0.8618 |
| 70 | rs7821152  | Monomorphic         |        |        |        |        |
| 71 | rs4403430  | 0.2121              | 0.2544 | 0.3582 | 0.1022 | 0.5605 |
| 72 | rs11137086 | 0.2916              | <NA>   | <NA>   | <NA>   | 0.2916 |
| 73 | rs6982814  | 0.2916              | <NA>   | <NA>   | <NA>   | 0.2916 |
| 74 | rs11776120 | 0.2322              | 0.1394 | 0.2854 | 0.2118 | 0.1094 |
| 75 | rs6993492  | 0.1118              | 0.6798 | 0.0578 | 0.2761 | 0.8431 |
| 76 | rs7824527  | 0.3424              | <NA>   | <NA>   | <NA>   | 0.3424 |
| 77 | rs13275347 | Monomorphic         |        |        |        |        |
| 78 | rs7825124  | 0.4735              | <NA>   | <NA>   | <NA>   | 0.4735 |
| 79 | rs4841816  | Monomorphic         |        |        |        |        |
| 80 | rs4433170  | 0.4125              | 0.3335 | 0.2965 | 0.4566 | 0.2651 |
| 81 | rs4300028  | 0.6692              | <NA>   | <NA>   | <NA>   | 0.6692 |
| 82 | rs4500099  | Monomorphic         |        |        |        |        |
| 83 | rs4576447  | Monomorphic         |        |        |        |        |
| 84 | rs6994783  | 0.6692              | <NA>   | <NA>   | <NA>   | 0.6692 |
| 85 | rs7015200  | 0.5921              | 0.7934 | 0.3891 | 0.4505 | 0.8647 |
| 86 | rs17466706 | Monomorphic         |        |        |        |        |
| 87 | rs11775034 | 0.1809              | 0.0949 | 0.2965 | 0.1469 | 0.0759 |
| 88 | rs7004995  | 0.7484              | 0.7493 | 0.4482 | 0.9072 | 0.5653 |
| 89 | rs6982904  | 0.4047              | 0.5089 | 0.1933 | 0.9743 | 0.2789 |
| 90 | rs4840666  | 0.2976              | 0.4008 | 0.3628 | 0.1317 | 0.9013 |
| 91 | rs4621824  | 0.2912              | 0.8247 | 0.1611 | 0.3335 | 0.6987 |
| 92 | rs4345578  | 0.179               | <NA>   | <NA>   | <NA>   | 0.179  |
| 93 | rs4342629  | 0.8885              | 0.7237 | 0.6693 | 0.9819 | 0.6321 |
| 94 | rs4342630  | Monomorphic         |        |        |        |        |
| 95 | rs4342631  | Monomorphic         |        |        |        |        |

|     |            |             |        |        |        |        |
|-----|------------|-------------|--------|--------|--------|--------|
| 96  | rs4549798  | 0.9258      | 0.8125 | 0.84   | 0.6968 | 0.9576 |
| 97  | rs4342632  | Monomorphic |        |        |        |        |
| 98  | rs13256091 | 0.0947      | 0.1024 | 0.2965 | 0.0504 | 0.2203 |
| 99  | rs4601339  | Monomorphic |        |        |        |        |
| 100 | rs4367573  | 0.4195      | 0.6006 | 0.3046 | 0.2831 | 0.9831 |
| 101 | rs7461488  | Monomorphic |        |        |        |        |
| 102 | rs4642671  | Monomorphic |        |        |        |        |
| 103 | rs4546682  | 0.5213      | <NA>   | <NA>   | <NA>   | 0.5213 |
| 104 | rs6981771  | 0.4073      | 0.6717 | 0.2745 | 0.3035 | 0.8954 |
| 105 | rs6996918  | 0.5725      | 0.57   | 0.4714 | 0.357  | 0.8589 |
| 106 | rs7009276  | 0.4525      | 0.7263 | 0.2843 | 0.357  | 0.8634 |
| 107 | rs4841818  | 0.8252      | <NA>   | <NA>   | <NA>   | 0.8252 |
| 108 | rs4358823  | 0.1848      | <NA>   | <NA>   | <NA>   | 0.1848 |
| 109 | rs12716641 | 0.6046      | 0.6309 | 0.4714 | 0.4008 | 0.9156 |
| 110 | rs12716642 | 0.9356      | 0.7582 | 0.7881 | 0.8465 | 0.7211 |
| 111 | rs13274544 | 0.8361      | <NA>   | <NA>   | <NA>   | 0.8361 |
| 112 | rs13439266 | 0.0674      | <NA>   | <NA>   | <NA>   | 0.0674 |
| 113 | rs12716644 | Monomorphic |        |        |        |        |
| 114 | rs11989117 | 0.1037      | <NA>   | <NA>   | <NA>   | 0.1037 |
| 115 | rs7836636  | 0.4647      | 0.2201 | 0.6914 | 0.3335 | 0.3083 |
| 116 | rs10086568 | 0.9526      | 0.9278 | 0.7964 | 0.7934 | 0.9479 |
| 117 | rs12674716 | 0.303       | 0.3663 | 0.4092 | 0.1223 | 0.936  |
| 118 | rs13252474 | 0.5227      | 0.6232 | 0.4588 | 0.2631 | 0.904  |
| 119 | rs12716645 | 0.3582      | 0.8606 | 0.224  | 0.2238 | 0.5807 |
| 120 | rs10108420 | 0.5188      | 0.2635 | 0.8968 | 0.3821 | 0.4388 |
| 121 | rs12716647 | 0.6608      | 0.4998 | 0.7776 | 0.3732 | 0.8012 |
| 122 | rs13261710 | 0.6088      | 0.3807 | 0.4052 | 0.7747 | 0.3198 |
| 123 | rs13270539 | 0.4345      | 0.784  | 0.2106 | 0.3993 | 0.3904 |
| 124 | rs4304345  | 0.5604      | <NA>   | <NA>   | <NA>   | 0.5604 |
| 125 | rs7017585  | 0.4284      | 0.2043 | 0.6139 | 0.3017 | 0.2939 |
| 126 | rs7017864  | Monomorphic |        |        |        |        |
| 127 | rs7017866  | 0.4246      | 0.9278 | 0.2487 | 0.2856 | 0.5666 |
| 128 | rs6992098  | 0.4256      | 0.9554 | 0.224  | 0.3266 | 0.4804 |
| 129 | rs13279261 | 0.4349      | 0.1969 | 0.5213 | 0.4006 | 0.2461 |
| 130 | rs2979406  | Monomorphic |        |        |        |        |
| 131 | rs2979405  | Monomorphic |        |        |        |        |
| 132 | rs6988346  | 0.3137      | 0.1604 | 0.2843 | 0.3878 | 0.1279 |
| 133 | rs4841822  | 0.6976      | <NA>   | <NA>   | <NA>   | 0.6976 |
| 134 | rs4260915  | 0.9142      | 0.7636 | 0.8434 | 0.6727 | 0.9087 |
| 135 | rs4260916  | 0.7837      | 0.5278 | 0.9109 | 0.5045 | 0.6993 |
| 136 | rs4379464  | 0.9526      | 0.9278 | 0.7964 | 0.7934 | 0.9479 |
| 137 | rs12682030 | 0.5604      | <NA>   | <NA>   | <NA>   | 0.5604 |
| 138 | rs13269815 | 0.2871      | 0.1901 | 0.1676 | 0.6038 | 0.1228 |
| 139 | rs6998006  | 0.4246      | 0.9278 | 0.2487 | 0.2856 | 0.5666 |
| 140 | rs6998687  | 0.3389      | 0.1473 | 0.3617 | 0.4566 | 0.1591 |
| 141 | rs6991235  | 0.3389      | 0.1473 | 0.3617 | 0.4566 | 0.1591 |
| 142 | rs6999181  | 0.5604      | <NA>   | <NA>   | <NA>   | 0.5604 |
| 143 | rs2979404  | Monomorphic |        |        |        |        |
| 144 | rs11773934 | Monomorphic |        |        |        |        |
| 145 | rs11137087 | 0.6486      | 0.5267 | 0.692  | 0.357  | 0.883  |
| 146 | rs10503360 | 0.2925      | 0.2484 | 0.1464 | 0.8908 | 0.1265 |
| 147 | rs4446760  | Monomorphic |        |        |        |        |
| 148 | rs10867025 | 0.3693      | 0.4849 | 0.1599 | 0.8753 | 0.2636 |
| 149 | rs9644778  | 0.9615      | 0.7917 | 0.9888 | 0.7909 | 0.8513 |
| 150 | rs7839771  | Monomorphic |        |        |        |        |
| 151 | rs10095331 | 0.6859      | 0.8953 | 0.3891 | 0.7263 | 0.6289 |
| 152 | rs10098290 | Monomorphic |        |        |        |        |
| 153 | rs4395911  | 0.983       | 0.853  | 0.937  | 0.8797 | 0.8644 |
| 154 | rs4610776  | 0.9843      | 0.8953 | 0.937  | 0.8611 | 0.9449 |
| 155 | rs6988319  | 0.6805      | <NA>   | <NA>   | <NA>   | 0.6805 |
| 156 | rs4841831  | 0.2024      | <NA>   | <NA>   | <NA>   | 0.2024 |
| 157 | rs10093453 | 0.7281      | <NA>   | <NA>   | <NA>   | 0.7281 |
| 158 | rs11994229 | 0.1194      | 0.2523 | 0.1376 | 0.1089 | 0.535  |
| 159 | rs17078614 | 0.3807      | <NA>   | <NA>   | <NA>   | 0.3807 |

|     |            |             |        |        |        |        |
|-----|------------|-------------|--------|--------|--------|--------|
| 160 | rs10100920 | 0.8092      | <NA>   | <NA>   | <NA>   | 0.8092 |
| 161 | rs7834209  | 0.1006      | <NA>   | <NA>   | <NA>   | 0.1006 |
| 162 | rs12547547 | Monomorphic |        |        |        |        |
| 163 | rs4240691  | 0.8879      | 0.9278 | 0.659  | 0.7263 | 0.8896 |
| 164 | rs4448295  | Monomorphic |        |        |        |        |
| 165 | rs17078622 | 0.8381      | 0.57   | 0.7612 | 0.6593 | 0.5529 |
| 166 | rs17078623 | 0.6057      | <NA>   | <NA>   | <NA>   | 0.6057 |
| 167 | rs13280193 | Monomorphic |        |        |        |        |

### CHINESE-JAPANESE

|    | SNP        | codominant         | dominant | recessive | overdominant | additive |
|----|------------|--------------------|----------|-----------|--------------|----------|
| 1  | rs13257112 | Monomorphic        |          |           |              |          |
| 2  | rs17381964 | Monomorphic        |          |           |              |          |
| 3  | rs6996047  | 0.5485             | <NA>     | <NA>      | <NA>         | 0.5485   |
| 4  | rs11996293 | Monomorphic        |          |           |              |          |
| 5  | rs11996346 | 0.5548             | <NA>     | <NA>      | <NA>         | 0.5548   |
| 6  | rs4543566  | Monomorphic        |          |           |              |          |
| 7  | rs13267882 | Monomorphic        |          |           |              |          |
| 8  | rs13278672 | Monomorphic        |          |           |              |          |
| 9  | rs2978947  | 0.8501             | 0.6326   | 0.9659    | 0.5997       | 0.7885   |
| 10 | rs3739385  | Monomorphic        |          |           |              |          |
| 11 | rs2702875  | 0.8863             | 0.6688   | 1,6688    | 0.6613       | 0.795    |
| 12 | rs17078435 | Monomorphic        |          |           |              |          |
| 13 | rs2978945  | Monomorphic        |          |           |              |          |
| 14 | rs2978944  | 0.807              | 0.5643   | 1,5643    | 0.5634       | 0.7246   |
| 15 | rs17078436 | Monomorphic        |          |           |              |          |
| 16 | rs2977819  | 0.8482             | 0.6639   | 0.9019    | 0.5784       | 0.8426   |
| 17 | rs10087798 | Monomorphic        |          |           |              |          |
| 18 | rs10106288 | Monomorphic        |          |           |              |          |
| 19 | rs2978916  | 0.4651             | 0.6995   | 0.3494    | 0.2608       | 0.7981   |
| 20 | rs2615766  | Monomorphic        |          |           |              |          |
| 21 | rs2927342  | Monomorphic        |          |           |              |          |
| 22 | rs12682063 | 0.5485             | <NA>     | <NA>      | <NA>         | 0.5485   |
| 23 | rs12682076 | Monomorphic        |          |           |              |          |
| 24 | rs12675298 | Monomorphic        |          |           |              |          |
| 25 | rs2978915  | 0.6643             | 0.5987   | 0.3744    | 0.8035       | 0.4168   |
| 26 | rs2738113  | 0.7522             | 0.6995   | 0.4531    | 0.8035       | 0.5179   |
| 27 | rs2738110  | 0.6643             | 0.5987   | 0.3744    | 0.8035       | 0.4168   |
| 28 | rs2978914  | Monomorphic        |          |           |              |          |
| 29 | rs10095450 | 0.0531             | <NA>     | <NA>      | <NA>         | 0.0531   |
| 30 | rs11137081 | 0.9512             | <NA>     | <NA>      | <NA>         | 0.9512   |
| 31 | rs5028372  | Geno typing 77.8%% |          |           |              |          |
| 32 | rs4841815  | 0.5186             | 0.3261   | 0.4051    | 0.475        | 0.2798   |
| 33 | rs4284061  | 0.3377             | 0.1575   | 0.9189    | 0.1887       | 0.2758   |
| 34 | rs11781199 | 0.233              | <NA>     | <NA>      | <NA>         | 0.233    |
| 35 | rs11781205 | 0.2603             | <NA>     | <NA>      | <NA>         | 0.2603   |
| 36 | rs17466573 | Monomorphic        |          |           |              |          |
| 37 | rs7825750  | 0.6913             | 0.7278   | 0.4051    | 0.9266       | 0.598    |
| 38 | rs6983783  | Monomorphic        |          |           |              |          |
| 39 | rs4300027  | 0.4244             | 0.4177   | 0.2412    | 0.8257       | 0.2358   |
| 40 | rs10109569 | Monomorphic        |          |           |              |          |
| 41 | rs7826487  | 0.3949             | 0.4942   | 0.4268    | 0.2164       | 0.858    |
| 42 | rs17078510 | 0.3949             | 0.4942   | 0.4268    | 0.2164       | 0.858    |
| 43 | rs7841223  | 0.3949             | 0.4942   | 0.4268    | 0.2164       | 0.858    |
| 44 | rs7012647  | Monomorphic        |          |           |              |          |
| 45 | rs4288398  | 0.5943             | 0.4177   | 0.4268    | 0.7278       | 0.3134   |
| 46 | rs4313182  | 0.8282             | 0.6944   | 0.5859    | 0.8004       | 0.6324   |
| 47 | rs883182   | 0.6659             | 0.6342   | 0.4051    | 0.8257       | 0.5209   |
| 48 | rs11783110 | Monomorphic        |          |           |              |          |
| 49 | rs4314670  | Monomorphic        |          |           |              |          |
| 50 | rs4332158  | 0.2617             | 0.1863   | 0.2051    | 0.4808       | 0.1264   |
| 51 | rs4332159  | 0.7799             | 0.7852   | 0.5585    | 0.6678       | 0.9116   |
| 52 | rs4448289  | Monomorphic        |          |           |              |          |

|     |            |             |        |        |        |        |
|-----|------------|-------------|--------|--------|--------|--------|
| 53  | rs4469481  | 0.7939      | 0.8444 | 0.5485 | 0.7212 | 0.9693 |
| 54  | rs9774483  | 0.7799      | 0.7852 | 0.5585 | 0.6678 | 0.9116 |
| 55  | rs17078531 | Monomorphic |        |        |        |        |
| 56  | rs17382179 | Monomorphic |        |        |        |        |
| 57  | rs4840665  | Monomorphic |        |        |        |        |
| 58  | rs6984215  | 0.4753      | 0.5784 | 0.2412 | 0.9705 | 0.324  |
| 59  | rs6605579  | 0.7043      | 0.5987 | 0.6223 | 0.4183 | 0.8651 |
| 60  | rs7820625  | 0.8346      | 0.6701 | 0.6072 | 0.9266 | 0.5611 |
| 61  | rs7816622  | 0.8227      | 0.9313 | 0.5352 | 0.7579 | 0.7021 |
| 62  | rs7821152  | Monomorphic |        |        |        |        |
| 63  | rs4403430  | 0.7735      | 0.475  | 0.7852 | 0.7278 | 0.5554 |
| 64  | rs11137086 | 0.7799      | 0.7852 | 0.5585 | 0.6678 | 0.9116 |
| 65  | rs6982814  | 0.7873      | 0.8141 | 0.5536 | 0.6938 | 0.9398 |
| 66  | rs11776120 | 0.5849      | 0.9705 | 0.3048 | 0.7278 | 0.7252 |
| 67  | rs6993492  | 0.7873      | 0.8141 | 0.5536 | 0.6938 | 0.9398 |
| 68  | rs7824527  | 0.7408      | 0.6739 | 0.5762 | 0.5666 | 0.8052 |
| 69  | rs13275347 | Monomorphic |        |        |        |        |
| 70  | rs7825124  | 0.7799      | 0.7852 | 0.5585 | 0.6678 | 0.9116 |
| 71  | rs4841816  | Monomorphic |        |        |        |        |
| 72  | rs4433170  | 0.384       | 0.1887 | 0.5585 | 0.2348 | 0.1738 |
| 73  | rs4300028  | 0.6388      | 0.4942 | 0.4268 | 0.8257 | 0.3606 |
| 74  | rs4500099  | Monomorphic |        |        |        |        |
| 75  | rs4576447  | Monomorphic |        |        |        |        |
| 76  | rs6994783  | Monomorphic |        |        |        |        |
| 77  | rs7015200  | 0.5518      | 0.5745 | 0.4588 | 0.2792 | 0.9159 |
| 78  | rs17466706 | Monomorphic |        |        |        |        |
| 79  | rs11775034 | 0.5849      | 0.4633 | 0.4051 | 0.6342 | 0.3807 |
| 80  | rs7004995  | 0.6084      | 0.5519 | 0.5519 | 0.3188 | 1.3188 |
| 81  | rs4840666  | 0.1673      | 0.2725 | 0.3482 | 0.059  | 0.8466 |
| 82  | rs17078556 | 0.3819      | 0.4127 | 0.4588 | 0.1664 | 0.9014 |
| 83  | rs4621824  | 0.3059      | 0.4127 | 0.3494 | 0.1297 | 0.9774 |
| 84  | rs4342629  | 0.2066      | 0.3115 | 0.3821 | 0.0762 | 0.8663 |
| 85  | rs4342630  | Monomorphic |        |        |        |        |
| 86  | rs4342631  | Monomorphic |        |        |        |        |
| 87  | rs4549798  | 0.3518      | 0.3891 | 0.4399 | 0.1493 | 0.892  |
| 88  | rs4342632  | Monomorphic |        |        |        |        |
| 89  | rs13256091 | 0.4954      | 0.567  | 0.2412 | 0.9839 | 0.348  |
| 90  | rs4601339  | Monomorphic |        |        |        |        |
| 91  | rs4367573  | 0.7378      | 0.6326 | 0.4497 | 0.9659 | 0.4893 |
| 92  | rs7461488  | Monomorphic |        |        |        |        |
| 93  | rs4642671  | Monomorphic |        |        |        |        |
| 94  | rs4546682  | 0.6017      | 0.9839 | 0.3344 | 0.4633 | 0.5574 |
| 95  | rs6981771  | 0.6463      | 0.8596 | 0.3731 | 0.6706 | 0.5935 |
| 96  | rs6996918  | 0.7021      | 0.567  | 0.4268 | 0.9019 | 0.437  |
| 97  | rs7009276  | 0.4937      | 0.5027 | 0.2478 | 0.9332 | 0.314  |
| 98  | rs4841818  | 0.5027      | 0.6639 | 0.2412 | 0.8737 | 0.4061 |
| 99  | rs4358823  | 0.5027      | 0.6639 | 0.2412 | 0.8737 | 0.4061 |
| 100 | rs12716641 | 0.7021      | 0.567  | 0.4268 | 0.9019 | 0.437  |
| 101 | rs12716642 | 0.7021      | 0.567  | 0.4268 | 0.9019 | 0.437  |
| 102 | rs13274544 | 0.7282      | 0.6156 | 0.4648 | 0.8036 | 0.5261 |
| 103 | rs13439266 | Monomorphic |        |        |        |        |
| 104 | rs12716644 | Monomorphic |        |        |        |        |
| 105 | rs11989117 | Monomorphic |        |        |        |        |
| 106 | rs7836636  | 0.1258      | 0.249  | 0.0447 | 0.3861 | 0.0519 |
| 107 | rs10086568 | 0.636       | 0.3951 | 0.5585 | 0.475  | 0.3639 |
| 108 | rs12674716 | 0.6638      | 0.3719 | 0.7024 | 0.5011 | 0.4456 |
| 109 | rs13252474 | 0.5262      | 0.2575 | 0.6706 | 0.4177 | 0.318  |
| 110 | rs12716645 | 0.7623      | 0.4622 | 0.8004 | 0.5962 | 0.528  |
| 111 | rs10108420 | 0.3363      | 0.2407 | 0.259  | 0.5371 | 0.1704 |
| 112 | rs12716647 | 0.7623      | 0.4622 | 0.8004 | 0.5962 | 0.528  |
| 113 | rs13261710 | 0.5262      | 0.2575 | 0.6706 | 0.4177 | 0.318  |
| 114 | rs13270539 | 0.0619      | 0.0666 | 1.0666 | 0.0236 | 0.2142 |
| 115 | rs4304345  | 0.2474      | 0.2882 | 0.4268 | 0.1088 | 0.619  |
| 116 | rs7017864  | Monomorphic |        |        |        |        |

|     |            |             |        |        |        |        |
|-----|------------|-------------|--------|--------|--------|--------|
| 117 | rs7017866  | 0.473       | 0.2214 | 0.6476 | 0.3861 | 0.2806 |
| 118 | rs6992098  | 0.5855      | 0.3032 | 0.7416 | 0.4277 | 0.3774 |
| 119 | rs13279261 | 0.5569      | 0.2792 | 0.6476 | 0.461  | 0.33   |
| 120 | rs2979406  | Monomorphic |        |        |        |        |
| 121 | rs2979405  | Monomorphic |        |        |        |        |
| 122 | rs6988346  | 0.4304      | 0.3861 | 0.3992 | 0.2608 | 0.6138 |
| 123 | rs4841822  | 0.5672      | 0.3195 | 0.5927 | 0.3831 | 0.2983 |
| 124 | rs4260915  | 0.6576      | 0.4179 | 0.5659 | 0.5011 | 0.3845 |
| 125 | rs4260916  | 0.773       | 0.5748 | 0.5811 | 0.6706 | 0.5267 |
| 126 | rs4379464  | 0.636       | 0.3951 | 0.5585 | 0.475  | 0.3639 |
| 127 | rs12682030 | 0.2474      | 0.2882 | 0.4268 | 0.1088 | 0.619  |
| 128 | rs13269815 | 0.6299      | 0.7278 | 0.4051 | 0.5457 | 0.9372 |
| 129 | rs6998006  | 0.5262      | 0.2575 | 0.6706 | 0.4177 | 0.318  |
| 130 | rs6998687  | 0.473       | 0.2214 | 0.6476 | 0.3861 | 0.2806 |
| 131 | rs6991235  | 0.5262      | 0.2575 | 0.6706 | 0.4177 | 0.318  |
| 132 | rs6999181  | 0.2474      | 0.2882 | 0.4268 | 0.1088 | 0.619  |
| 133 | rs2979404  | Monomorphic |        |        |        |        |
| 134 | rs11773934 | Monomorphic |        |        |        |        |
| 135 | rs11137087 | 0.473       | 0.2214 | 0.6476 | 0.3861 | 0.2806 |
| 136 | rs10503360 | 0.5933      | 0.3129 | 0.5503 | 0.5853 | 0.3276 |
| 137 | rs4446760  | Monomorphic |        |        |        |        |
| 138 | rs10867025 | 0.669       | 0.9832 | 0.3736 | 0.7861 | 0.7864 |
| 139 | rs9644778  | 0.8394      | <NA>   | <NA>   | <NA>   | 0.8394 |
| 140 | rs10095331 | 0.2474      | 0.2882 | 0.4268 | 0.1088 | 0.619  |
| 141 | rs10098290 | Monomorphic |        |        |        |        |
| 142 | rs4395911  | 0.2059      | 0.2348 | 0.4268 | 0.0846 | 0.5446 |
| 143 | rs4610776  | 0.7651      | <NA>   | <NA>   | <NA>   | 0.7651 |
| 144 | rs6988319  | 0.2474      | 0.538  | 0.0948 | 0.5997 | 0.2022 |
| 145 | rs4841831  | 0.9032      | 0.7688 | 0.6678 | 0.9266 | 0.665  |
| 146 | rs10093453 | 0.7179      | 0.6639 | 0.6678 | 0.4177 | 0.9708 |
| 147 | rs11994229 | Monomorphic |        |        |        |        |
| 148 | rs17078614 | 0.7591      | 0.5665 | 0.5585 | 0.6706 | 0.5149 |
| 149 | rs10100920 | Monomorphic |        |        |        |        |
| 150 | rs7834209  | 0.8459      | 0.7339 | 0.5745 | 0.8802 | 0.589  |
| 151 | rs12547547 | Monomorphic |        |        |        |        |
| 152 | rs4240691  | 0.9032      | 0.7688 | 0.6678 | 0.9266 | 0.665  |
